# Supplementary material
Source: Springer Nature journal article supplement (https://www.springermedizin.de/resource/supplementary/12913_2012_2643_MOESM1_ESM.pdf/9531042)

# Goal setting and action planning process

● G-AP

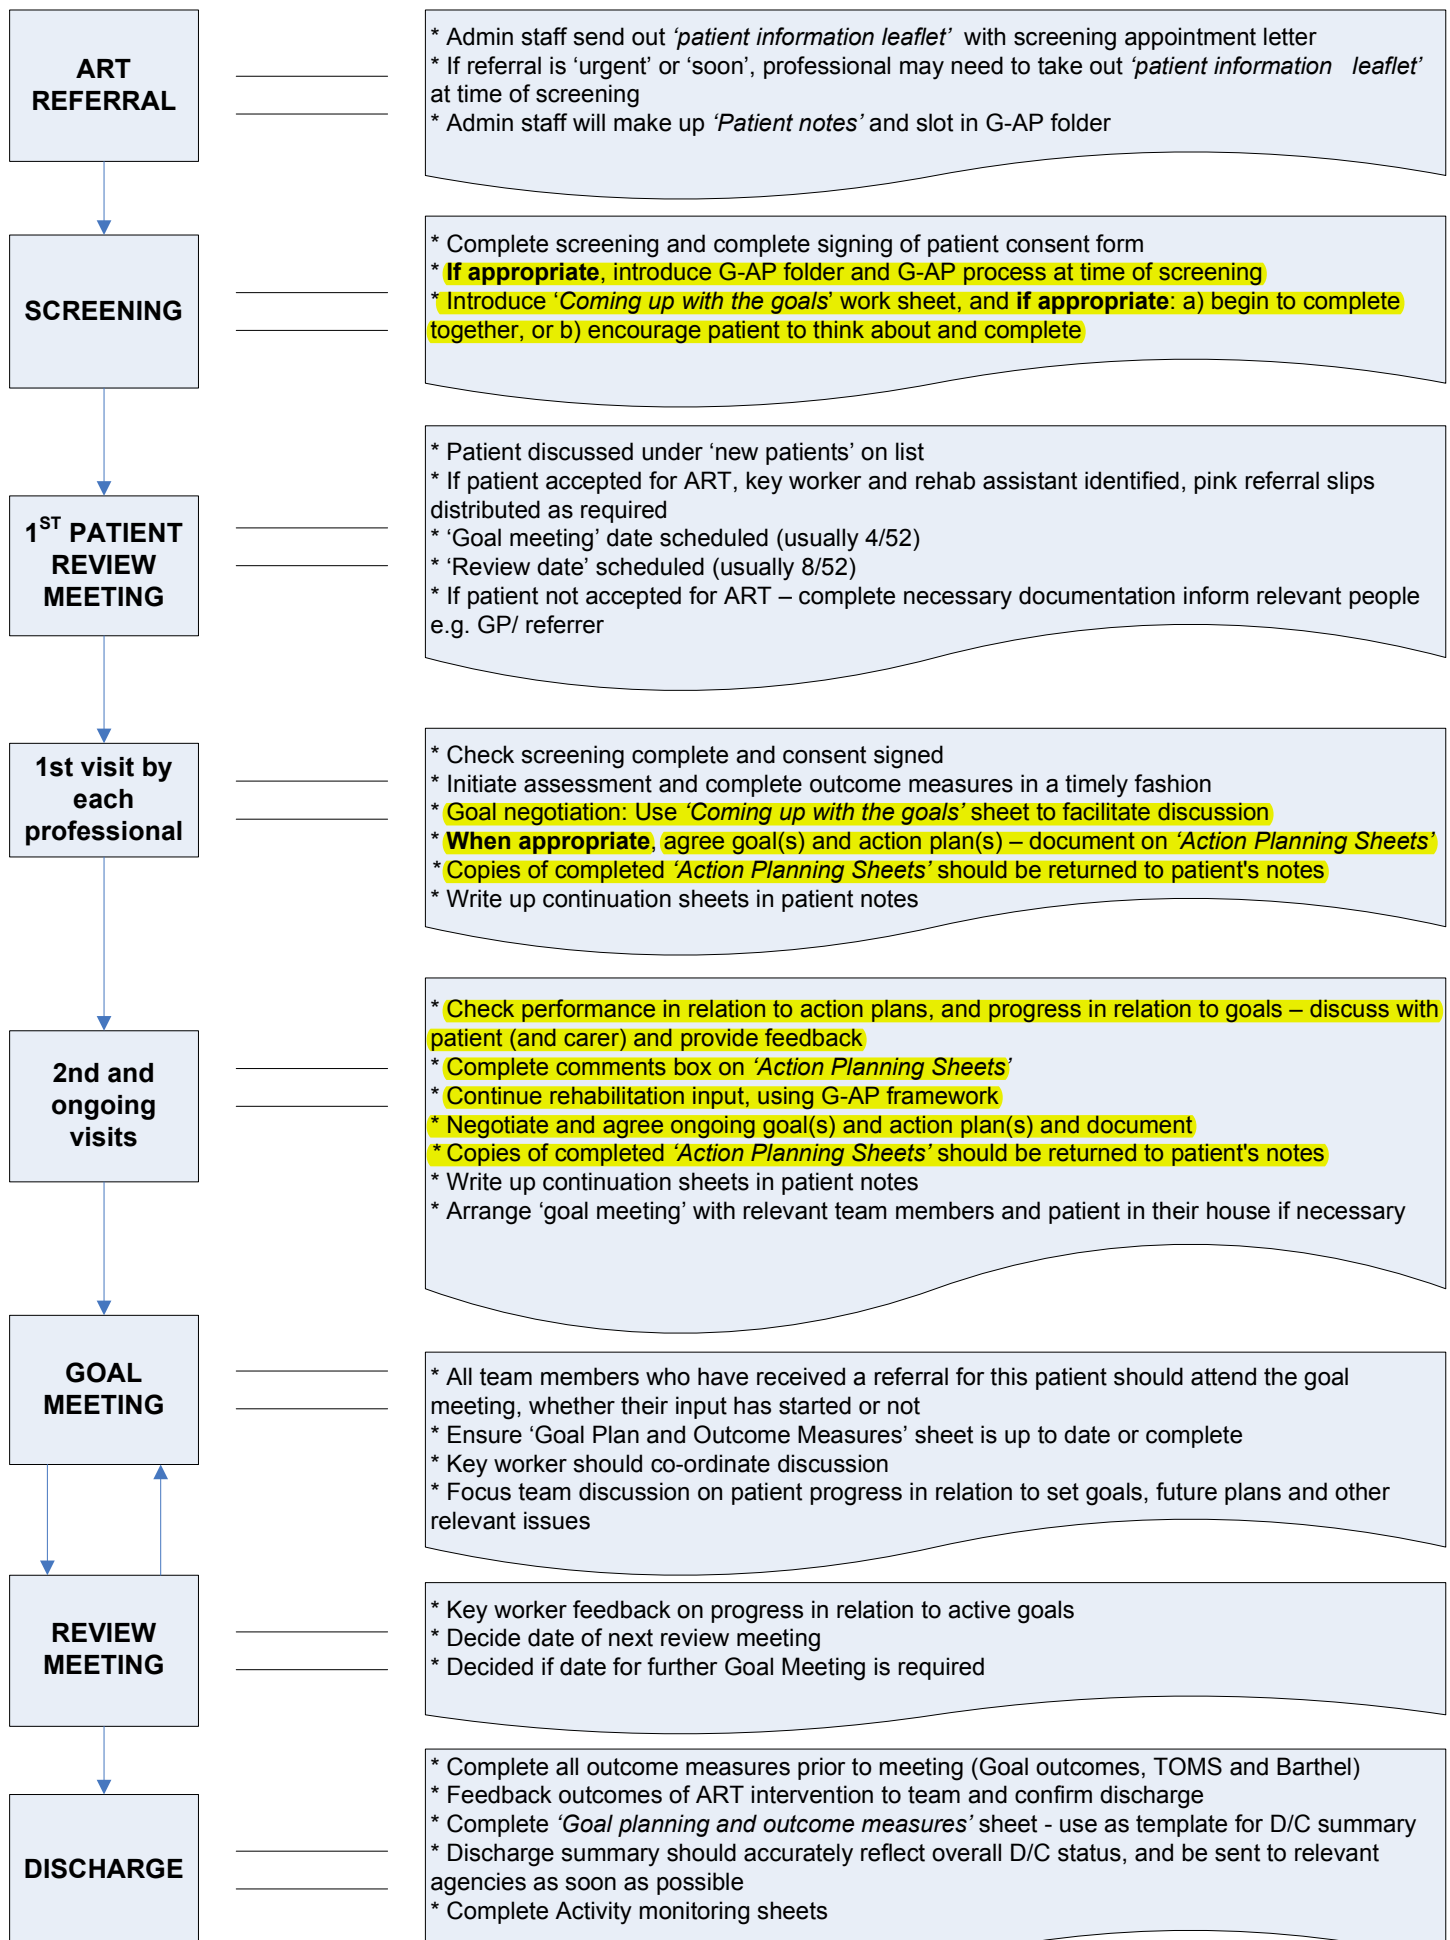

Supplement: MOESM1 [file 9531042]
